# Supplementary material
Source: PubMed Central journal article supplement (PMC7802494)
Supplement: flgastro-2019-101372supp001.pdf [file flgastro-2019-101372supp001.pdf]

**Physicians' attitude and barriers towards the implementation of therapeutic drug monitoring of anti-TNF therapy in inflammatory bowel disease real-life clinical practice questionnaire.** (Single answers per question only unless otherwise stated)

**A. PHYSICIAN-RELATED QUESTIONS:**

1. Please tell us where do you work? (tick all that apply)

|                           |  |
|---------------------------|--|
| District General Hospital |  |
| Tertiary Centre           |  |
| Teaching Hospital         |  |
| Private Practice          |  |

2. Please tell us your grade:

|                               |  |
|-------------------------------|--|
| Consultant Gastroenterologist |  |
| Registrar (Gastroenterology)  |  |
| IBD Nurse Specialist          |  |
| Other (please specify)        |  |

3. What is your gender?

|        |  |
|--------|--|
| Male   |  |
| Female |  |

4. What is your age?

|             |  |
|-------------|--|
| 25-34 years |  |
| 35-44 years |  |
| 45-54 years |  |
| 55-64 years |  |
| ≥65 years   |  |

5. How many years (after your gastroenterology certification) have you been in practice?

|                       |  |
|-----------------------|--|
| 0 (still in training) |  |
| <1 year               |  |
| 1-4 years             |  |
| 5-9 years             |  |
| 10-19 years           |  |
| >20 years             |  |

6. What percentage of your patients have inflammatory bowel disease (IBD)?

|        |  |
|--------|--|
| <10%   |  |
| 11-25% |  |
| 26-50% |  |
| >50%   |  |

7. How many patients with IBD do you evaluate and/or treat on average in a one-month period?  
(please provide your best estimate)

|       |  |
|-------|--|
| <5    |  |
| 5-10  |  |
| 11-20 |  |
| 20-30 |  |
| >30   |  |

(If <5: Thank you for your participation. This survey refers exclusively to medical practitioners who evaluate and/or treat  $\geq 5$  IBD patients on average in a one month period)

8. In any given month, on average how many of your IBD patients are treated with anti-TNF therapy?  
(Please provide your best estimate)

|       |  |
|-------|--|
| 0     |  |
| 1-4   |  |
| 5-10  |  |
| 11-20 |  |

(If 0: Thank you for your participation. This survey refers exclusively to medical practitioners who use anti-TNF therapy to treat IBD)

**B. TDM-RELATED QUESTIONS:**

9. Do you check anti-TNF drug concentrations and anti-drug antibodies?

|     |                          |
|-----|--------------------------|
| Yes | <input type="checkbox"/> |
| No  | <input type="checkbox"/> |

(If no, go to question 12)

10. In which clinical scenarios do you check anti-TNF drug concentrations to your IBD patients? (You can check more than one)

|                                                                                                                             |                          |
|-----------------------------------------------------------------------------------------------------------------------------|--------------------------|
| A. Secondary loss of response (patients who initially responded to anti-TNF therapy but now develop symptoms of active IBD) | <input type="checkbox"/> |
| B. Primary nonresponse (post-induction)                                                                                     | <input type="checkbox"/> |
| C. Re-starting anti-TNF therapy after a drug holiday                                                                        | <input type="checkbox"/> |
| D. Proactive therapeutic drug monitoring (during maintenance therapy in patients responding to anti-TNF therapy)            | <input type="checkbox"/> |

11. How often do you check anti-TNF drug concentrations during maintenance therapy in patients responding to anti-TNF therapy (proactive therapeutic drug monitoring)?

|                         |                          |
|-------------------------|--------------------------|
| Never                   | <input type="checkbox"/> |
| Every 2 months          | <input type="checkbox"/> |
| Every 6 months          | <input type="checkbox"/> |
| Every 12 months         | <input type="checkbox"/> |
| Every 24 months         | <input type="checkbox"/> |
| Other (please specify): | <input type="checkbox"/> |

12. Indicate how much you agree or disagree with the following statements regarding barriers to the implementation of therapeutic drug monitoring (TDM) of anti-TNF therapy in real-life clinical practice.

| Statement                                                                       | Strongly Disagree | Somewhat Disagree | Neither Agree nor Disagree | Somewhat Agree | Strongly Agree |
|---------------------------------------------------------------------------------|-------------------|-------------------|----------------------------|----------------|----------------|
| A. Test is expensive                                                            |                   |                   |                            |                |                |
| B. Uncertainty about availability in my Trust/practice                          |                   |                   |                            |                |                |
| C. Lack of overall knowledge of TDM                                             |                   |                   |                            |                |                |
| D. Lack of knowledge on how to interpret and what to do with the results of TDM |                   |                   |                            |                |                |
| E. Time lag from serum sampling to results of TDM                               |                   |                   |                            |                |                |
| F. TDM is cumbersome and/or time consuming                                      |                   |                   |                            |                |                |
| G. Lack of good evidence-based medicine of the usefulness of TDM in IBD         |                   |                   |                            |                |                |
| H. Lack of clinical guidelines recommending the use of TDM                      |                   |                   |                            |                |                |
| I. Other (please specify)                                                       |                   |                   |                            |                |                |

13. Which 3 of the above statements would you rate in order of importance as the biggest barriers to the implementation of therapeutic drug monitoring of anti-TNF therapy in real-life clinical practice.

1. ....
2. ....
3. ....

14. If all barriers were removed, would you check anti-TNF drug concentrations? (only for participants who replied no to question 9)

|     |  |
|-----|--|
| Yes |  |
| No  |  |

(If yes, go to question 16 / if no, end of the survey, thank you very much for your participation.)

15. If all barriers were removed, in which clinical scenarios would you check anti-TNF drug concentrations to your IBD patients? (you can check more than one)

|                                                                                                               |  |
|---------------------------------------------------------------------------------------------------------------|--|
| Secondary loss of response (patients on anti-TNF who had responded but now develop symptoms of active IBD)    |  |
| Primary nonresponse (post-induction)                                                                          |  |
| Re-starting anti-TNF therapy after a drug holiday                                                             |  |
| Proactive therapeutic drug monitoring (during maintenance therapy in patients responding to anti-TNF therapy) |  |

16. If all barriers were removed, how often would you check anti-TNF drug concentrations during maintenance therapy in patients responding to anti-TNF therapy (proactive therapeutic drug monitoring)?

|                         |  |
|-------------------------|--|
| Never                   |  |
| Every 2 months          |  |
| Every 6 months          |  |
| Every 12 months         |  |
| Every 24 months         |  |
| Other (please specify): |  |

17. "Does your trust have a negotiated free TDM package provided with your anti-TNF supplier?"

|     |  |
|-----|--|
| Yes |  |
| No  |  |

End of the survey. Thank you very much for your participation.
